# Supplementary material for: Evaluating dispersal potential of an invasive fish by the use of aerobic scope and osmoregulation capacity
Source: PubMed Central journal article supplement (PMC5397051; doi:10.1371/journal.pone.0176038), 2017-04-19
Supplement: pone.0176038.s001.pdf [file pone.0176038.s001.pdf]

Supplementary material to Behrens et al

|              |                                                                                             |
|--------------|---------------------------------------------------------------------------------------------|
| Fish:        | Fish ID (R=respirometry, O=blood plasma osmolality)                                         |
| Salinity:    | Treatment salinity (PSU)                                                                    |
| BM           | Body mass in wet weight (g)                                                                 |
| TL           | Tail length (mm)                                                                            |
| MMR          | Maximum metabolic rate ( $\text{mgO}_2 \text{ kg}^{-1} \text{ h}^{-1}$ )                    |
| SMR          | Standard metabolic rate ( $\text{mgO}_2 \text{ kg}^{-1} \text{ h}^{-1}$ )                   |
| AS           | Aerobic scope ( $\text{MMR}-\text{SMR}$ ) ( $\text{mgO}_2 \text{ kg}^{-1} \text{ h}^{-1}$ ) |
| Blood Osm    | blood plasma osmolality (mOsm/kg)                                                           |
| Amb Osm      | Ambient osmolality (mOsm/kg)                                                                |
| Osm gradient | Osmotic gradient ( $[\text{Blood osm} - \text{Amb osm}]$ (mOsm/kg))                         |

For fish used in respirometry (denoted with R) MMR data from fish R24 and R38 were excluded from the data analysis (see text in Material and Methods for details and reasoning). Since  $\text{AS}=\text{MMR}-\text{SMR}$ , AS from these two fish was not obtained either.

| Fish | Salinity | BM | TL  | MMR    | SMR   | AS     |
|------|----------|----|-----|--------|-------|--------|
| R1   | 30       | 45 | 154 | 264.20 | 74.31 | 189.89 |
| R2   | 30       | 64 | 157 | 235.80 | 94.21 | 141.59 |
| R3   | 30       | 57 | 156 | 338.10 | 65.26 | 272.84 |
| R4   | 25       | 57 | 153 | 229.80 | 64.81 | 164.99 |
| R5   | 25       | 50 | 147 | 249.80 | 91.58 | 158.22 |
| R6   | 25       | 50 | 161 | 332.30 | 56.77 | 275.53 |
| R7   | 25       | 44 | 158 | 295.20 | 66.03 | 229.17 |
| R8   | 25       | 37 | 143 | 236.90 | 50.14 | 186.76 |
| R9   | 25       | 37 | 147 | 371.28 | 50.80 | 320.48 |
| R10  | 25       | 34 | 133 | 377.14 | 54.64 | 322.50 |
| R11  | 30       | 47 | 154 | 368.16 | 66.97 | 301.19 |
| R12  | 30       | 38 | 143 | 309.94 | 71.94 | 238.00 |
| R13  | 30       | 42 | 143 | 322.50 | 51.33 | 271.17 |
| R14  | 30       | 43 | 153 | 251.20 | 69.14 | 182.06 |
| R15  | 20       | 60 | 162 | 304.84 | 55.52 | 249.32 |
| R16  | 20       | 73 | 178 | 404.78 | 73.52 | 331.26 |
| R17  | 20       | 66 | 168 | 361.20 | 58.05 | 303.15 |
| R18  | 20       | 43 | 149 | 384.12 | 68.04 | 316.08 |
| R19  | 20       | 49 | 148 | 322.09 | 53.07 | 269.02 |
| R20  | 20       | 50 | 156 | 314.12 | 57.39 | 256.73 |
| R21  | 20       | 49 | 151 | 364.00 | 61.92 | 302.08 |
| R22  | 20       | 43 | 147 | 373.43 | 66.84 | 306.59 |
| R23  | 15       | 78 | 177 | 350.20 | 64.65 | 285.55 |
| R24  | 15       | 54 | 147 | 234.70 | 48.99 | 185.71 |
| R25  | 15       | 74 | 170 | 342.20 | 74.41 | 267.79 |
| R26  | 15       | 48 | 149 | 373.50 | 69.19 | 304.31 |
| R27  | 15       | 43 | 146 | 433.70 | 60.51 | 373.19 |
| R28  | 15       | 41 | 142 | 350.30 | 49.77 | 300.53 |
| R29  | 15       | 74 | 167 | 359.60 | 68.04 | 291.56 |
| R30  | 0        | 39 | 144 | 342.90 | 71.08 | 271.82 |
| R31  | 0        | 52 | 151 | 236.70 | 72.52 | 164.18 |
| R32  | 0        | 63 | 164 | 387.00 | 64.79 | 322.21 |
| R33  | 0        | 46 | 145 | 473.96 | 62.72 | 411.24 |
| R34  | 0        | 41 | 142 | 474.12 | 72.16 | 401.96 |
| R35  | 0        | 76 | 171 | 359.10 | 74.46 | 284.64 |
| R36  | 0        | 50 | 145 | 322.70 | 70.66 | 252.04 |
| R37  | 0        | 56 | 155 | 241.40 | 62.79 | 178.61 |
| R38  | 10       | 72 | 170 | 205.40 | 44.32 | 161.08 |
| R39  | 10       | 59 | 160 | 337.00 | 46.02 | 290.98 |
| R40  | 10       | 43 | 150 | 288.80 | 47.27 | 241.53 |
| R41  | 10       | 53 | 162 | 329.24 | 51.12 | 278.12 |
| R42  | 10       | 51 | 157 | 418.10 | 45.78 | 372.32 |
| R43  | 10       | 39 | 143 | 353.70 | 51.74 | 301.96 |
| R44  | 10       | 36 | 134 | 501.40 | 57.71 | 443.69 |
| R45  | 10       | 70 | 158 | 452.50 | 59.24 | 393.26 |
| R46  | 30       | 25 | 123 | 198.54 | 79.22 | 119.33 |
| R47  | 25       | 50 | 150 | 296.70 | 62.32 | 234.38 |
| R48  | 15       | 35 | 132 | 385.60 | 49.43 | 336.17 |

Supplementary material to Behrens et al

| Fish | Salinity | BM  | TL  | Blood Osm | Amb Osm | Osm gradient |
|------|----------|-----|-----|-----------|---------|--------------|
| O1   | 0        | 45  | 141 | 306       | 4       | 302          |
| O2   | 0        | 37  | 135 | 328       | 4       | 324          |
| O3   | 0        | 82  | 173 | 335       | 4       | 331          |
| O4   | 0        | 127 | 210 | 325       | 4       | 321          |
| O5   | 0        | 82  | 170 | 337       | 4       | 333          |
| O6   | 0        | 53  | 150 | 340       | 4       | 336          |
| O7   | 0        | 63  | 158 | 340       | 4       | 336          |
| O8   | 0        | 53  | 156 | 329       | 4       | 325          |
| O9   | 0        | 70  | 164 | 332       | 4       | 328          |
| O10  | 0        | 45  | 138 | 350       | 4       | 346          |
| O11  | 10       | 50  | 150 | 334       | 263     | 71           |
| O12  | 10       | 57  | 156 | 334       | 263     | 71           |
| O13  | 10       | 67  | 168 | 320       | 263     | 57           |
| O14  | 10       | 68  | 160 | 313       | 263     | 50           |
| O15  | 10       | 54  | 156 | 350       | 263     | 87           |
| O16  | 10       | 38  | 150 | 339       | 263     | 76           |
| O17  | 10       | 58  | 161 | 340       | 263     | 77           |
| O18  | 10       | 88  | 185 | 352       | 263     | 89           |
| O19  | 10       | 57  | 164 | 344       | 263     | 81           |
| O20  | 15       | 50  | 149 | 334       | 422     | 89           |
| O21  | 15       | 100 | 195 | 337       | 422     | 85           |
| O22  | 15       | 74  | 168 | 335       | 422     | 88           |
| O23  | 15       | 47  | 148 | 351       | 422     | 72           |
| O24  | 15       | 74  | 174 | 339       | 422     | 84           |
| O25  | 15       | 42  | 142 | 327       | 422     | 96           |
| O26  | 15       | 86  | 189 | 352       | 422     | 71           |
| O27  | 15       | 80  | 176 | 364       | 422     | 58           |
| O28  | 15       | 47  | 145 | 345       | 422     | 78           |
| O29  | 15       | 52  | 148 | 337       | 422     | 86           |
| O30  | 20       | 77  | 188 | 325       | 601     | 276          |
| O31  | 20       | 59  | 165 | 337       | 601     | 264          |
| O32  | 20       | 48  | 154 | 352       | 601     | 250          |
| O33  | 20       | 66  | 167 | 321       | 601     | 281          |
| O34  | 20       | 65  | 176 | 339       | 601     | 262          |
| O35  | 20       | 47  | 160 | 336       | 601     | 266          |
| O36  | 20       | 99  | 196 | 348       | 601     | 254          |
| O37  | 20       | 47  | 150 | 342       | 601     | 259          |
| O38  | 20       | 51  | 154 | 356       | 601     | 246          |
| O39  | 20       | 42  | 148 | 354       | 601     | 248          |
| O40  | 25       | 48  | 152 | 331       | 747     | 417          |
| O41  | 25       | 51  | 157 | 322       | 747     | 425          |
| O42  | 25       | 49  | 162 | 352       | 747     | 396          |
| O43  | 25       | 50  | 155 | 332       | 747     | 415          |
| O44  | 25       | 52  | 154 | 340       | 747     | 407          |
| O45  | 25       | 77  | 183 | 409       | 747     | 339          |
| O46  | 25       | 40  | 143 | 355       | 747     | 393          |
| O47  | 25       | 77  | 183 | 417       | 747     | 330          |
| O48  | 25       | 42  | 151 | 352       | 747     | 396          |
| O49  | 25       | 48  | 147 | 335       | 747     | 413          |
| O50  | 30       | 88  | 180 | 372       | 844     | 472          |
| O51  | 30       | 62  | 163 | 349       | 844     | 495          |
| O52  | 30       | 45  | 144 | 382       | 844     | 463          |
| O53  | 30       | 54  | 157 | 353       | 844     | 491          |
| O54  | 30       | 62  | 159 | 356       | 844     | 488          |
| O55  | 30       | 45  | 150 | 452       | 844     | 392          |
| O56  | 30       | 40  | 142 | 366       | 844     | 478          |
| O57  | 30       | 41  | 145 | 360       | 844     | 484          |
| O58  | 30       | 44  | 148 | 359       | 844     | 486          |

Supplementary material to Behrens et al

| Salinity | Survival (%) |
|----------|--------------|
| 0        | 93           |
| 10       | 94           |
| 15       | 95           |
| 20       | 89           |
| 25       | 72           |
| 30       | 61           |
